# Supplementary material for: Molecular dynamics discrimination of the conformational states of calmodulin through solid-state nanopores
Source: Royal Society of Chemistry journal article supplement (doi:10.1039/d0cp02500c), 2020-01-01
Supplement: d0cp02500c1.pdf [file d0cp02500c1.pdf]

## Molecular dynamics discrimination of the conformational states of Calmodulin through solid-state nanopore

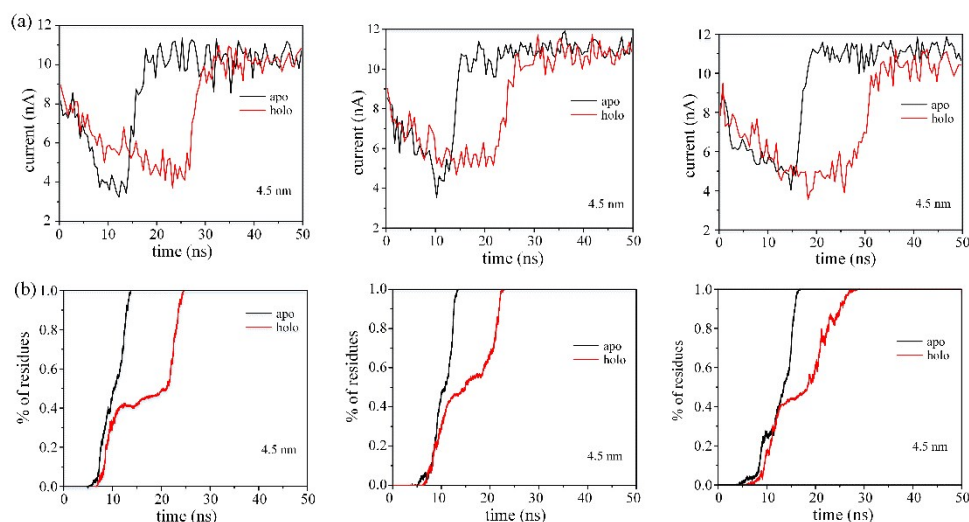

Figure S1. Replicate 1 of CaMs translocation behavior in silicon nitride nanopore with diameters of 4.5 nm for three replicated simulations at bias voltage 600 mV. (a) Typical current-time traces for apo-CaM and holo-CaM. (b) The percentage of the CaMs residues transported through the midplane of the  $\text{Si}_3\text{N}_4$  membrane (% of residues) versus simulation times  $t$ .

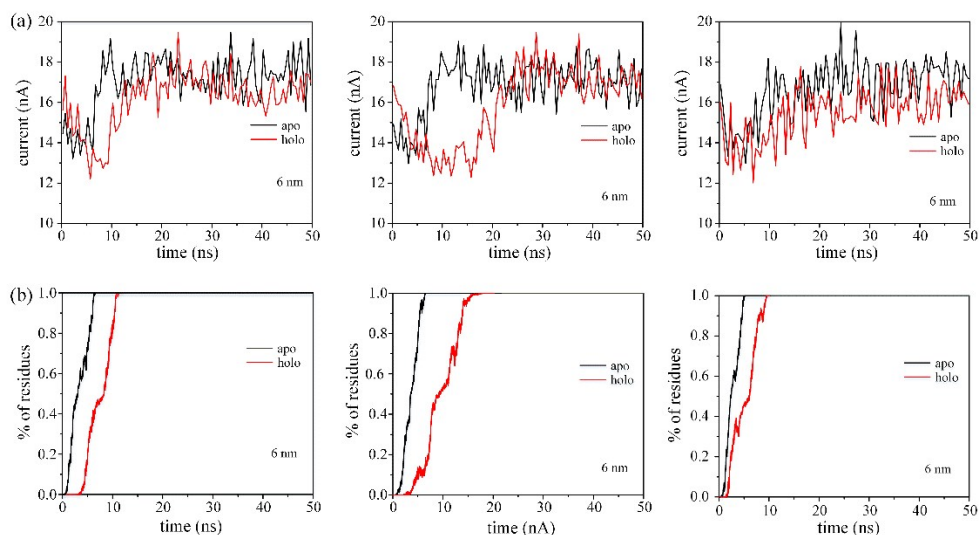

Figure S2. Replicate 2 of CaMs translocation behavior in silicon nitride nanopore with different of 6 nm for three replicated simulations at bias voltage 600 mV. (a) Typical current-time traces for apo-CaM and holo-CaM. (b) The percentage of the CaMs residues transported through the midplane of the  $\text{Si}_3\text{N}_4$  membrane (% of residues) versus simulation times  $t$ .
